# Supplementary material for: A Systematic Review of Integrated Functional Near-Infrared Spectroscopy (fNIRS) and Transcranial Magnetic Stimulation (TMS) Studies
Source: Front Neurosci. 2019 Feb 28;13:84. doi: 10.3389/fnins.2019.00084 (PMC6403189; doi:10.3389/fnins.2019.00084)
Supplement: Supplementary Table 1 — Detailed list of stimulation parameters and qualitative results for all studies investigating stimulation at rest. [file Table_1.xlsx]

## Sheet: S1 Rest
Supplementary Table 1 for "A systematic review of integrated functional near-infrared spectroscopy (fNIRS) and Transcranial Magnetic Stimulation (TMS) Studies" Curtin, Tong, Sun,Wang, Onaral and Ayaz* Systematic Review, Front. Neurosci. DOI: 10.3389/fnins.2019.00084
TMS Evoked changes measured by fNIRS at Rest
													Ipsilateral			Contralateral
Paper ID	Author, Year	Cortex	SpecificSite	NumSub	Pop.	On/Offline	Time	%RMT	StimType	Excit/Inhib	Dose	Obs Time	Δ[HbO]	Δ[HbR]	Δ[HbT]	Δ[HbO]	Δ[HbR]	Δ[HbT]		Notes
DLPFC																					NS, Not Significant; NM, Not measured; NR, Not Reported
181	Oliviero, 1999	DLPFC	F2	10	HC	Offline	2min	100 machine	0.25Hz	~Inhib	30	0-5m post	Increase	NS	NR	NM	NM	NM
156	Hanaoka, 2006	DLPFC	5cm ant.	11	HC	Online	1min	50	1Hz	Inhib	60	during	NM	NM	NM	Decrease	NS	NR
143	Aoyama, 2009	DLPFC	5cm ant.	10	HC	Online	1min	58	1Hz	Inhib	60	during	NM	NM	NM	Decrease	NS	NR
143	Aoyama, 2009	DLPFC	5cm ant.	10	HC	Online	1min	41	1Hz	Inhib	60	during	NM	NM	NM	NS	NS	NR
143	Aoyama, 2009	DLPFC	5cm ant.	10	HC	Online	1min	28	1Hz	Inhib	60	during	NM	NM	NM	NS	NS	NR
139	Kozel, 2009	DLPFC	5cm ant.	11	HC	Online	10s	120	1Hz	Inhib	10	10s	Decrease	NS	NR	Decrease	NS	NR
115	Thomson, 2011a	DLPFC	F3	12	HC	Online	1pulse	90	SP	NA	1	10s	NS	NR	NR	NM	NM	NM
115	Thomson, 2011a	DLPFC	F3	12	HC	Online	1pulse	110	SP	NA	1	10s	NS	NR	NR	NM	NM	NM
115	Thomson, 2011a	DLPFC	F3	12	HC	Online	1pulse	130	SP	NA	1	10s	Decrease	NR	NR	NM	NM	NM
122	Thomson, 2011b	DLPFC	F3	8	HC	Online	1pulse	120	SP	NA	1	10s	Decrease	NR	Decrease	NM	NM	NM
122	Thomson, 2011b	DLPFC	F3	8	HC	Online	1pulse	120	SICI	~Inhib	~2	10s	Decrease	NR	Decrease	NM	NM	NM
122	Thomson, 2011b	DLPFC	F3	8	HC	Online	1pulse	120	ICF	~Excit	~2	10s	Decrease	NR	Decrease	NM	NM	NM
102	Thomson, 2012a	DLPFC	F3	13	HC	Online	5s	130	2 pulse, 0.2hz	NA	2	15s	Decrease	NR	NR	NM	NM	NM
102	Thomson, 2012a	DLPFC	F3	13	HC	Online	15s	130	4 pulse,0.2hz	NA	4	15s	Decrease	NR	NR	NM	NM	NM
104	Thomson, 2012b	DLPFC	F3	6	HC	Online	10min	80	1Hz	Inhib	600	during	NS	NR	NR	NM	NM	NM
104	Thomson, 2012b	DLPFC	F3	6	HC	Online	10min	120	1Hz	Inhib	600	during	Decrease	NR	NR	NM	NM	NM
87	Thomson, 2013	DLPFC	F3	12	HC	Online	1pulse	120	SP	NA	1	10s	Decrease	NR	NR	NS	NR	NR
87	Thomson, 2013	DLPFC	F3	8	HC	Online	20s	120	1Hz	Inhib	20	25s	Increase	NR	NR	Increase	NR	NR		Early Drop in HbO, not present in later session, attribute to reduced CVR due to TMS
X1	Cao, 2013	DLPFC	F3	12	HC	Online	5s	110	1Hz	Inhib	5	5s	Decrease	NR	NR	NS	NR	NR
X1	Cao, 2013	DLPFC	F3	12	HC	Online	5s	110	2Hz	~Excit	10	10s	Increase	NR	NR	Increase	NR	NR
X1	Cao, 2013	DLPFC	F3	12	HC	Online	5s	110	5Hz	Excit	25	10s	Increase	NR	NR	Increase	NR	NR
23	Curtin, 2018	DLPFC	F3	17	HC	Online	2s	110	15Hz	Excit	30	15s	Increase	NS	NR	NS	NS	NR
23	Curtin, 2018	DLPFC	F3	17	HC	Online	1pulse	110	SP	NA	1	15s	NS	NS	NR	NS	NS	NR
23	Curtin, 2018	DLPFC	F3	17	HC	Online	2s	90	iTBS	Excit	30	15s	NS	NS	NR	NS	NS	NR
7	Shinba, 2018	DLPFC	5.5cm ant.	15	MDD	Online	37.5min	120	10Hz	Excit	3000	during	Increase	NR	NR	NM	NM	NM		Initial Session
7	Shinba, 2018	DLPFC	5.5cm ant.	15	MDD	Online	37.5min	120	10Hz	Excit	3000	during	NS	NR	NR	NM	NM	NM		Follow-up session showed diversity in response
Motor
181	Oliviero, 1999	M1	Hand area	4	HC	Offline	2min	100 machine	0.25Hz	~Inhib	30	0-5m post	Increase	NS	NR	NM	NM	NM
177	Noguchi, 2003	M1	FDI	6	HC	Online	1pulse	50	SP	NA	1	5s	NS	NS	NR	NM	NM	NM
177	Noguchi, 2003	M1	FDI	6	HC	Online	1pulse	64	SP	NA	1	5s	Increase	NS	NR	NM	NM	NM
177	Noguchi, 2003	M1	FDI	6	HC	Online	1pulse	79	SP	NA	1	5s	Increase	NS	NR	NM	NM	NM
166	Mochizuki, 2006	M1	FDI	8	HC	Online	1pulse	50	SP	NA	1	10s	NS	Decrease	Decrease	NM	NM	NM
166	Mochizuki, 2006	M1	FDI	8	HC	Online	1pulse	64	SP	NA	1	10s	NS	Decrease	Decrease	NM	NM	NM
166	Mochizuki, 2006	M1	FDI	8	HC	Online	1pulse	79	SP	NA	1	10s	NS	Decrease	Decrease	NM	NM	NM
164	Hada, 2006	M1	FDI	12	HC	Online	20s	80	0.5Hz	Inhib	10	20s	Decrease	NS	Decrease	NM	NM	NM
164	Hada, 2006	M1	FDI	12	HC	Online	20s	120	0.5Hz	Inhib	10	20s	Decrease	NS	Decrease	NM	NM	NM
164	Hada, 2006	M1	FDI	12	HC	Online	5s	80	2Hz	~Excit	10	20s	Decrease	NS	Decrease	NM	NM	NM
164	Hada, 2006	M1	FDI	12	HC	Online	5s	120	2Hz	~Excit	10	20s	Decrease	NS	Decrease	NM	NM	NM
154	Mochizuki, 2007	M1	FDI	8	HC	Online	2s	57	iTBS	Excit	30	10s	NM	NM	NM	Decrease*	NS	NR		Trend
154	Mochizuki, 2007	M1	FDI	8	HC	Online	2s	71	iTBS	Excit	30	10s	NM	NM	NM	Decrease*	NS	NR		Trend
139	Kozel, 2009	M1	APB	11	HC	Online	10s	120	1Hz	Inhib	10	10s	Decrease	NS	NR	Decrease	NS	NR
113	Nasi, 2011	M1	APB	13	HC	Online	8s	75	0.5Hz	Inhib	4	8	Decrease	NS	Decrease	Decrease	NS	Decrease
113	Nasi, 2011	M1	APB	13	HC	Online	8s	75	1Hz	Inhib	8	8	Decrease	NS	Decrease	Decrease	NS	Decrease
113	Nasi, 2011	M1	APB	13	HC	Online	8s	75	2Hz	~Excit	16	8	Decrease	Decrease	Decrease	Decrease	NS	Decrease
109	Hirose, 2011	M1	FDI	9	HC	Online	2min	79	QPS-5	Excit	96	during	NM	NM	NM	Decrease	NS	NR
109	Hirose, 2011	M1	FDI	9	HC	Online	2min	79	QPS-50	Inhib	96	during	NM	NM	NM	Decrease	NS	NR
92	Groiss, 2013	M1	FDI	10	HC	Online	2min	64	QPS-5	Excit	96	during	Decrease	NS	NR	NM	NM	NM
92	Groiss, 2013	M1	FDI	7	HC	Online	1 burst	64	QPS-5	Excit	4	10s	Decrease	NS	NR	NM	NM	NM
92	Groiss, 2013	M1	FDI	10	HC	Online	2min	64	QPS-50	Inhib	96	during	NS	NS	NR	NM	NM	NM
92	Groiss, 2013	M1	FDI	7	HC	Online	1 burst	64	QPS-50	Inhib	4	10s	NS	NS	NR	NM	NM	NM
89	Furubayashi, 2013	M1	FDI	15	HC	Online	1pulse	50	SP	NA	1	5s	Increase	NS	Increase	NM	NM	NM
89	Furubayashi, 2013	M1	FDI	15	HC	Online	1pulse	64	SP	NA	1	5s	Increase	NS	Increase	NM	NM	NM
89	Furubayashi, 2013	M1	FDI	15	HC	Online	1pulse	79	SP	NA	1	5s	Increase	NS	Increase	NM	NM	NM
88	Mesquita, 2013	M1	Hand area	7	HC	Online	20min	90	1Hz	Inhib	1200	during	Increase	NS	Increase	NS	NS	NS
26	Park, 2017	M1	FDI	10	HC	Online	20min	90	1Hz	Inhib	1200	during	NM	NM	NM	Increase	Decrease	NR
